# Supplementary material
Source: PubMed Central journal article supplement (PMC7012714)
Supplement: NIHMS1055664-supplement-1.pdf [file NIHMS1055664-supplement-1.pdf]

Supplemental Table 1. Percent sodium-dependency of the jejunum by disease and age.

|                             | <b>20-Weeks</b> |           | <b>30-Weeks</b> |           |
|-----------------------------|-----------------|-----------|-----------------|-----------|
| <b>% Sodium-dependency</b>  | <b>CKD</b>      | <b>NL</b> | <b>CKD</b>      | <b>NL</b> |
| Disappearance from loop (%) | 35              | 19        | 21              | 30        |
| Appearance into plasma (%)  | 25              | 33        | 24              | 23        |

Sodium-dependency was determined by (average absorption for the group given the absorption buffer with sodium – average absorption for the group given the buffer without sodium)/(sodium-containing buffer group).

Supplemental Table 2. Components of balance for phosphorus

| Component                      | 20-weeks-old |             | 30-weeks-old |             | P-Values          |                   |                     |               |
|--------------------------------|--------------|-------------|--------------|-------------|-------------------|-------------------|---------------------|---------------|
|                                | NL           | CKD         | NL           | CKD         | ANOVA Model       | Age (20 vs 30)    | Disease (CKD vs NL) | Age x Disease |
| <b>Balance (mg/d)</b>          | 4.6 (3.4)    | -2.4 (2.7)  | -9.68 (4.0)  | -16.9 (5.0) | <b>0.001</b>      | <b>0.0003</b>     | 0.07                | 0.98          |
| <b>Net absorption (mg/d)</b>   | 88.8 (2.2)   | 93.3 (1.97) | 74.6 (1.9)   | 78.2 (3.2)  | <b>&lt;0.0001</b> | <b>&lt;0.0001</b> | 0.09                | 0.84          |
| <b>Net absorption (%)</b>      | 48.6 (1.0)   | 51.1 (0.9)  | 43.9 (1.1)   | 47.3 (1.7)  | <b>0.0006</b>     | <b>0.0007</b>     | <b>0.01</b>         | 0.72          |
| <b>Fecal phosphorus (mg/d)</b> | 93.9 (2.0)   | 89.5 (2.6)  | 95.5 (2.2)   | 87.1 (3.5)  | 0.10              | 0.88              | <b>0.02</b>         | 0.46          |
| <b>Urine phosphorus (mg/d)</b> | 84.2 (2.4)   | 95.7 (2.8)  | 84.3 (3.6)   | 95.1 (4.8)  | <b>0.02</b>       | 0.94              | <b>0.002</b>        | 0.92          |
| <b>Dietary phosphorus</b>      | 182.7 (2.1)  | 182.8 (3.1) | 170.1 (1.7)  | 165.4 (3.5) | <b>&lt;0.0001</b> | <b>&lt;0.0001</b> | 0.38                | 0.37          |

|               |  |  |  |  |  |  |  |  |  |
|---------------|--|--|--|--|--|--|--|--|--|
| <b>intake</b> |  |  |  |  |  |  |  |  |  |
| <b>(mg/d)</b> |  |  |  |  |  |  |  |  |  |

Two-way ANOVA p-values for the overall model ( $P_{\text{Model}}$ ), main effect of age ( $P_{\text{Age}}$ ), main effect of disease ( $P_{\text{Disease}}$ ), and interaction of age and disease ( $P_{\text{Age} \times \text{Disease}}$ ) are shown, and means and (SEM) are shown for each group.

Supplemental Table 3. Components of balance for calcium

| Component                    | 20-weeks-old |             | 30-weeks-old |             | P-Values          |                   |                     |               |
|------------------------------|--------------|-------------|--------------|-------------|-------------------|-------------------|---------------------|---------------|
|                              | NL           | CKD         | NL           | CKD         | ANOVA Model       | Age (20 vs 30)    | Disease (CKD vs NL) | Age x Disease |
| <b>Balance (mg/d)</b>        | 17.7 (2.5)   | 18.4 (1.9)  | 5.5 (1.9)    | 8.3 (2.8)   | <b>&lt;0.0001</b> | <b>&lt;0.0001</b> | 0.43                | 0.64          |
| <b>Net absorption (mg/d)</b> | 19.9 (2.5)   | 21.9 (1.9)  | 8.7 (1.9)    | 13.4 (2.8)  | <b>0.0003</b>     | <b>&lt;0.0001</b> | 0.15                | 0.56          |
| <b>Net absorption (%)</b>    | 14.1 (1.7)   | 15.6 (1.3)  | 6.7 (1.4)    | 10.4 (2.2)  | <b>0.002</b>      | <b>0.0003</b>     | 0.12                | 0.51          |
| <b>Fecal calcium (mg/d)</b>  | 121.1 (2.7)  | 119.2 (2.9) | 122.7 (2.3)  | 114.3 (3.7) | 0.21              | 0.56              | 0.08                | 0.27          |
| <b>Urine calcium (mg/d)</b>  | 2.3 (0.1)    | 3.5 (0.2)   | 3.3 (0.2)    | 5.1 (0.4)   | <b>&lt;0.0001</b> | <b>&lt;0.0001</b> | <b>&lt;0.0001</b>   | 0.21          |

|                                      |             |             |             |             |                   |                   |      |      |
|--------------------------------------|-------------|-------------|-------------|-------------|-------------------|-------------------|------|------|
| <b>Dietary calcium intake (mg/d)</b> | 141.1 (1.7) | 141.1 (2.4) | 131.4 (1.3) | 127.7 (2.7) | <b>&lt;0.0001</b> | <b>&lt;0.0001</b> | 0.38 | 0.37 |
|--------------------------------------|-------------|-------------|-------------|-------------|-------------------|-------------------|------|------|

Two-way ANOVA p-values for the overall model ( $P_{\text{Model}}$ ), main effect of age ( $P_{\text{Age}}$ ), main effect of disease ( $P_{\text{Disease}}$ ), and interaction of age and disease ( $P_{\text{Age} \times \text{Disease}}$ ) are shown, and means and (SEM) are shown for each group.

Supplemental Table 4. Absorption of phosphorus by pH

|                                                             | <b>pH 5.5</b>                                 | <b>pH 7.4</b>                                 |
|-------------------------------------------------------------|-----------------------------------------------|-----------------------------------------------|
| <b>Absorption from loop with sodium-free buffer (%)</b>     | <b>CKD: 24.7 ± 5.3 %<br/>NL: 25.4 ± 6.1 %</b> | <b>CKD: 22.8 ± 4.2 %<br/>NL: 18.0 ± 4.2 %</b> |
| <b>Absorption from plasma with sodium-free buffer (AUC)</b> | <b>CKD: 0.51 ± 0.12<br/>NL: 0.39 ± 0.10</b>   | <b>CKD: 0.53 ± 0.14<br/>NL: 0.35 ± 0.10</b>   |

|                                                                   | <b>pH 9.4</b>                                 | <b>pH 7.4</b>                                 |
|-------------------------------------------------------------------|-----------------------------------------------|-----------------------------------------------|
| <b>Absorption from loop with sodium-containing buffer (%)</b>     | <b>CKD: 36.4 ± 2.0 %<br/>NL: 30.1 ± 2.8 %</b> | <b>CKD: 30.5 ± 1.7 %<br/>NL: 29.7 ± 1.6 %</b> |
| <b>Absorption from plasma with sodium-containing buffer (AUC)</b> | <b>CKD: 0.67 ± 0.18<br/>NL: 0.55 ± 0.20</b>   | <b>CKD: 0.67 ± 0.16<br/>NL: 0.50 ± 0.13</b>   |
